# Supplementary material for: A human mission to Mars: Predicting the bone mineral density loss of astronauts
Source: PLOS journal article supplement (doi:10.1371/journal.pone.0226434), 2020-01-22
Supplement: S4 (10.1371/journal.pone.0226434.s004) [file journal.pone.0226434.s004]

## SUPPLEMENTARY INFORMATION

**Table S1.** Predicted BMD loss in the femoral neck of crewmembers of different ages and ethnicities in an opposition-class mission to Mars with a total duration of 400 days.

| Astronauts<br>age (year) | Male               |                  |                    |                  |                  |                  | Female             |                  |                    |                  |                   |                  |
|--------------------------|--------------------|------------------|--------------------|------------------|------------------|------------------|--------------------|------------------|--------------------|------------------|-------------------|------------------|
|                          | Non-Hispanic white |                  | Non-Hispanic black |                  | Mexican American |                  | Non-Hispanic white |                  | Non-Hispanic black |                  | Mexican American  |                  |
|                          | Before<br>mission  | After<br>mission | Before mission     | After<br>mission | Before mission   | After<br>mission | Before mission     | After<br>mission | Before<br>mission  | After<br>mission | Before<br>mission | After<br>mission |
| 30-39                    | 0.887±0.134        | 0.749            | 1.005±0.158        | 0.848            | 0.922±0.127      | 0.778            | 0.825±0.120        | 0.696±0.120      | 0.913±0.130        | 0.771            | 0.867±0.125       | 0.732            |
| 40-49                    | 0.839±0.124        | 0.708            | 0.935±0.145        | 0.789            | 0.870±0.121      | 0.734            | 0.791±0.125        | 0.668±           | 0.915±0.153        | 0.772            | 0.848±0.127       | 0.716            |
