# Supplementary material for: A human mission to Mars: Predicting the bone mineral density loss of astronauts
Source: PLOS journal article supplement (doi:10.1371/journal.pone.0226434), 2020-01-22
Supplement: S8 (10.1371/journal.pone.0226434.s008) [file journal.pone.0226434.s008]

**Table S5.** Predictions of percent loss in bone mineral density at femoral neck in astronauts using data from astronauts (N=69) after 132- to 228-day spaceflights.

| <b>Mission<br/>time<br/>(days)</b> | <b>Mars<br/>mission<br/>(trajectory)</b> | <b>BMD loss<br/>prediction<br/>(%)</b> |
|------------------------------------|------------------------------------------|----------------------------------------|
| <b>400</b>                         | Opposition-<br>class (min)               | 15.6±1.3                               |
| <b>600</b>                         | Opposition-<br>class (max)               | 22.0±1.6                               |
| <b>1000</b>                        | Conjunction-<br>class (min)              | 32.4±2.1                               |
| <b>1200</b>                        | Conjunction-<br>class (max)              | 36.8±2.2                               |
